# Supplementary material for: BTP-based ligands and their complexes with Eu3+ at “oil”/water interfaces. A molecular dynamics study
Source: Royal Society of Chemistry journal article supplement (doi:10.1039/c000772b), 2010-01-01
Supplement: c000772b.pdf [file c000772b.pdf]

| Ligand                                                                            | Initial position | Averaging time (ns) | Interaction energy $\Delta E$ (kcal/mol) |           |                |
|-----------------------------------------------------------------------------------|------------------|---------------------|------------------------------------------|-----------|----------------|
|                                                                                   |                  |                     | BTP/Oil                                  | BTP/Water | BTP /Oil+Water |
| cyMe <sub>4</sub> BTP                                                             | Pos 2            | 0.3                 | -39 ± 8                                  | -31 ± 8   | -70            |
| <sup>i</sup> PrBTP                                                                | Pos 1            | 0.3                 | -35 ± 12                                 | -36 ± 5   | -71            |
|                                                                                   | Pos 2            | 0.3                 | -35 ± 8                                  | -37 ± 7   | -72            |
|                                                                                   | Pos 3            | 0.3                 | -43 ± 8                                  | -25 ± 5   | -68            |
| <sup>t</sup> But- <sup>i</sup> PrBTP                                              | Pos 1            | 0.3                 | -42 ± 11                                 | -32 ± 6   | -74            |
|                                                                                   | Pos 2            | 0.3                 | -37 ± 9                                  | -38 ± 6   | -75            |
|                                                                                   | Pos 3            | 0.3                 | -41 ± 7                                  | -34 ± 6   | -75            |
| cyMe <sub>4</sub> BTPH <sup>+</sup> NO <sub>3</sub> <sup>-</sup>                  | Pos 2            | 0.3                 | -63 ± 12                                 | -67 ± 13  | -130           |
| <sup>t</sup> But-cyMe <sub>4</sub> BTPH <sup>+</sup> NO <sub>3</sub> <sup>-</sup> | Pos 2            | 1.3                 | -67 ± 11                                 | -65 ± 14  | -132           |
| <sup>i</sup> PrBTPH <sup>+</sup> NO <sub>3</sub> <sup>-</sup>                     | Pos 1            | 1.5                 | -62 ± 12                                 | -83 ± 13  | -145           |
|                                                                                   | Pos 2            | 1.5                 | -54 ± 13                                 | -75 ± 28  | -129           |
|                                                                                   | Pos 3            | 1.5                 | -47 ± 19                                 | -87 ± 16  | -134           |
| <sup>t</sup> But- <sup>i</sup> PrBTPH <sup>+</sup> NO <sub>3</sub> <sup>-</sup>   | Pos 1            | 1.5                 | -63 ± 12                                 | -58 ± 30  | -121           |
|                                                                                   | Pos 2            | 1.5                 | -48 ± 15                                 | -91 ± 17  | -139           |
|                                                                                   | Pos 3            | 1.5                 | -53 ± 20                                 | -76 ± 23  | -129           |
| Oct- <sup>i</sup> PrBTPH <sup>+</sup> NO <sub>3</sub> <sup>-</sup>                | Pos 2            | 0.3                 | -61 ± 12                                 | -79 ± 11  | -140           |

Table S1. Substituted single BTP and BTPH<sup>+</sup> ligands at the OCT-HEX / Water interface. Average interaction energies  $\Delta E$  (kcal/mol) between BTP(H<sup>+</sup>) and the liquids

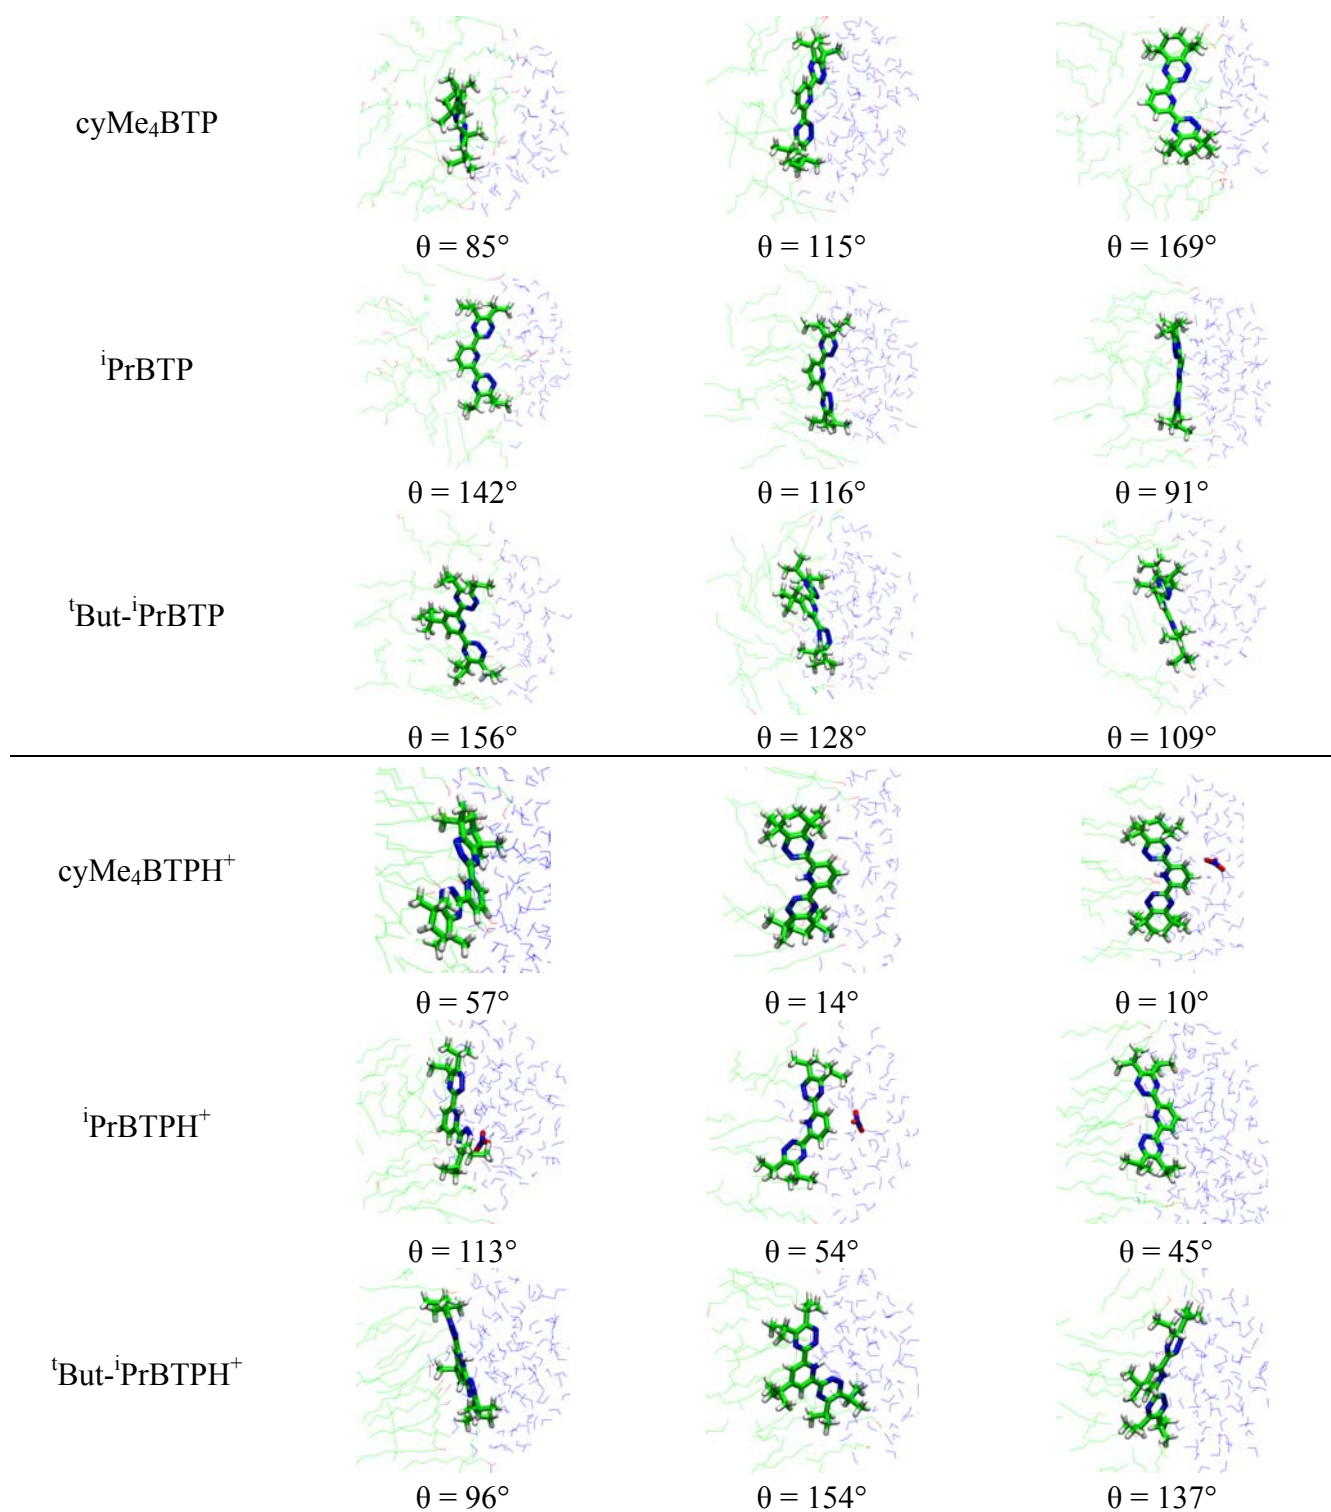

Figure S1 : Snapshots of typical orientations of single R-BTP and R-BTPH<sup>+</sup> at the OCT-HEX /water interface along the dynamics starting with Pos 2 ( $\theta_0 = 90^\circ$ ).

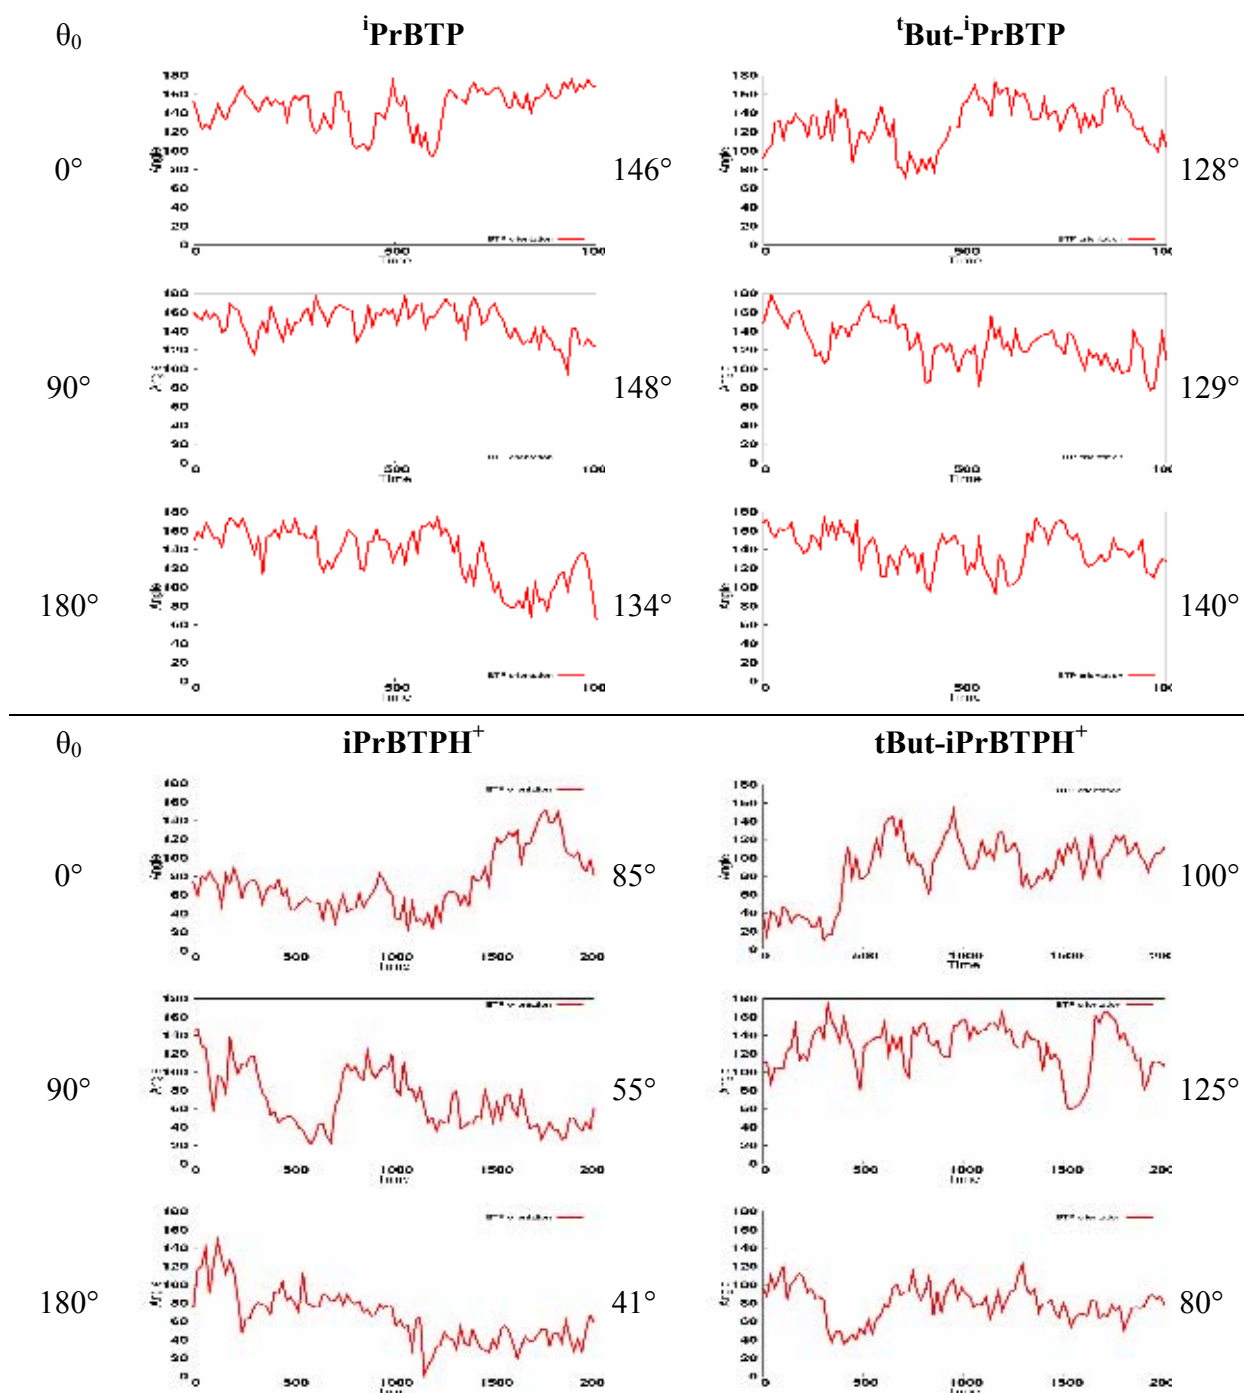

**Figure S2** : Orientation of single R-BTPs and BTPH<sup>+</sup>s at the OCT-HEX / water interface. Time evolution (in ps) of  $\theta$  for different initial orientations of  $N_{\text{pyr}}$  ( $\theta_0 = 0, 90$  or  $180^\circ$ ) and average on the last ns of dynamics.

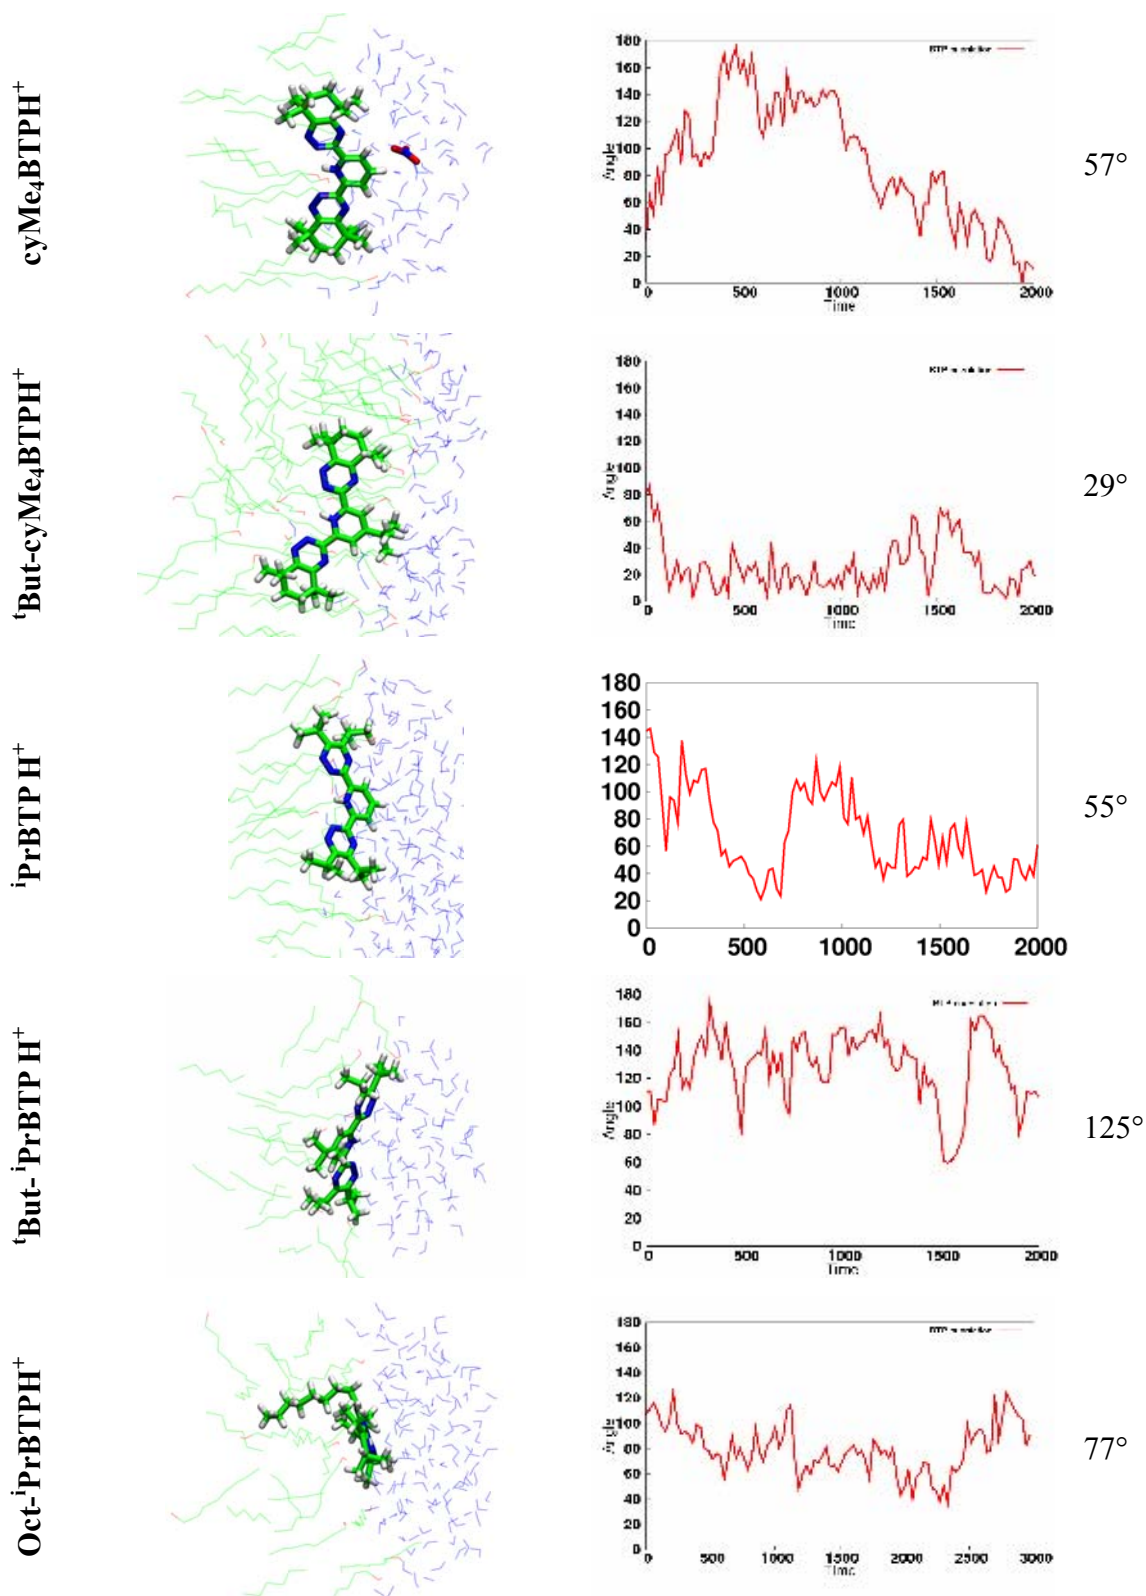

Figure S3 : R-CyMe<sub>4</sub>BTPH<sup>+</sup> and R-i-PrBTPH<sup>+</sup> single ligands simulated at the OCT-HEX / water interface, starting with  $\theta_0 = 90^\circ$  (Pos2 orientation). Snapshots at the end of the dynamics and time evolution (in ps) of  $\theta$  and average  $\langle \theta \rangle$  on the last ns of dynamics.



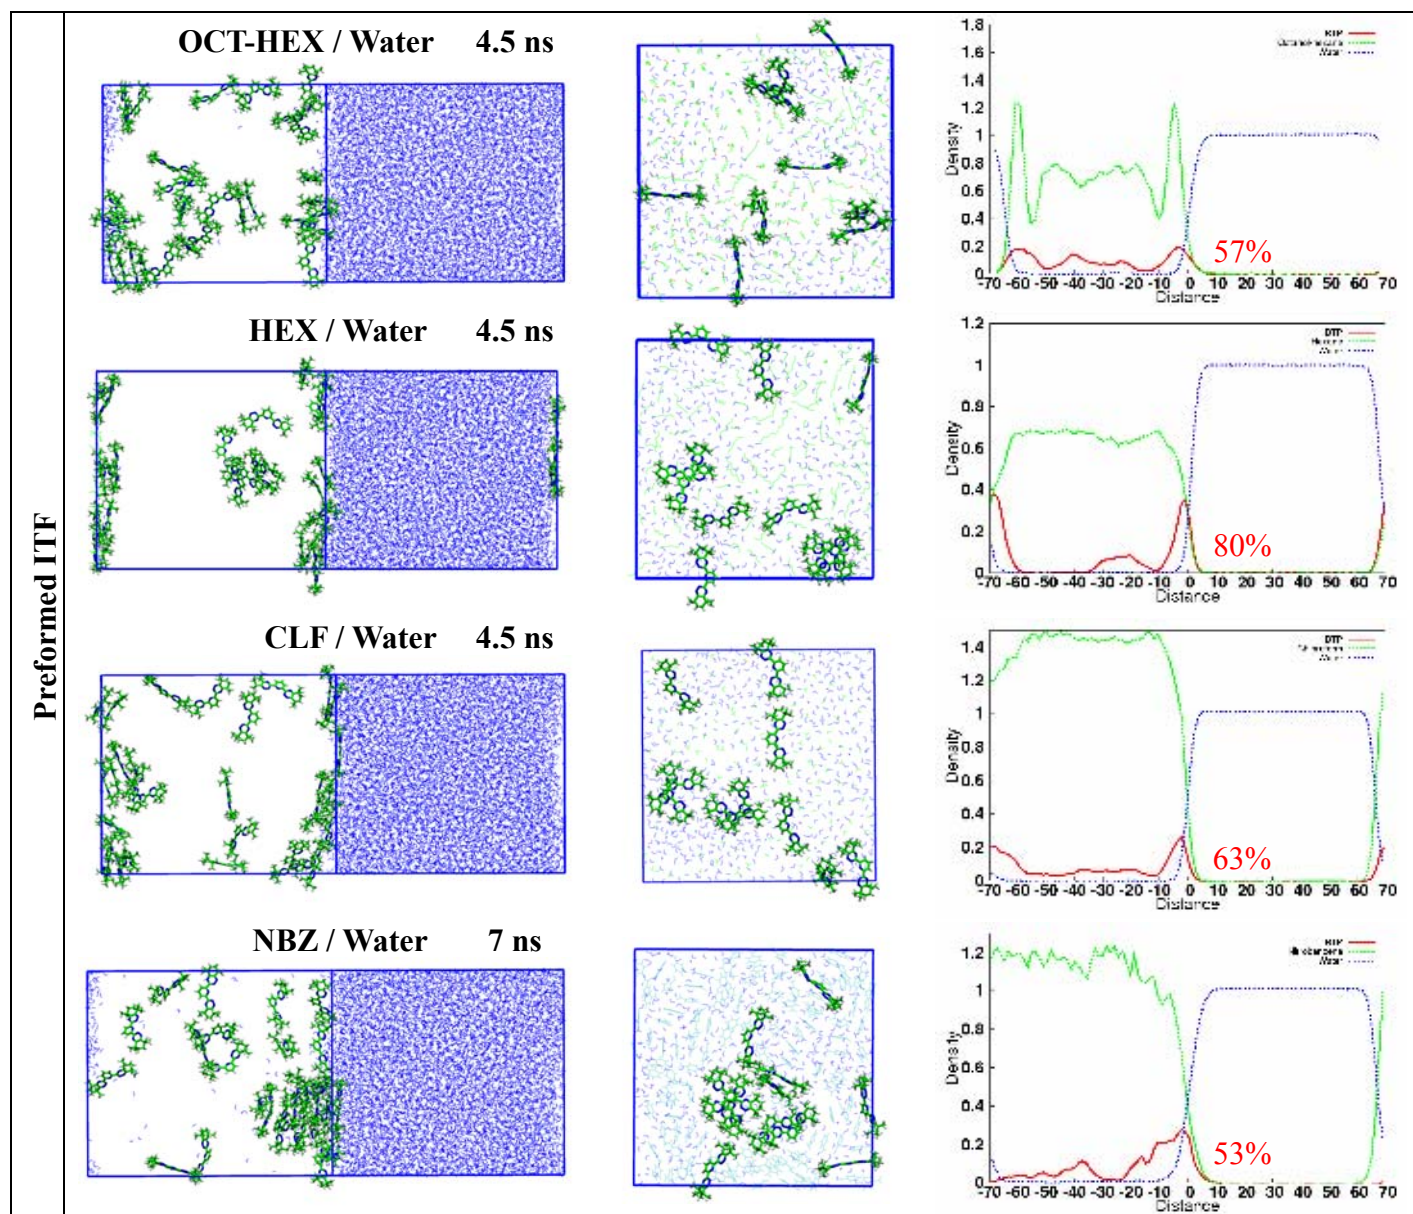

**Figure S4 :** 30 cyMe<sub>4</sub>BTP at “oil” / water preformed interfaces. *Left* : Final snapshots (“oil” hidden for clarity). *Middle*: Cross section of the interface (xy plane,  $\Delta z = 10 \text{ \AA}$ ). *Right*: Density curves of BTP (red), “oil” (green) and water (blue) and percentage of cyMe<sub>4</sub>BTPs within 5 Å from the two interfaces.

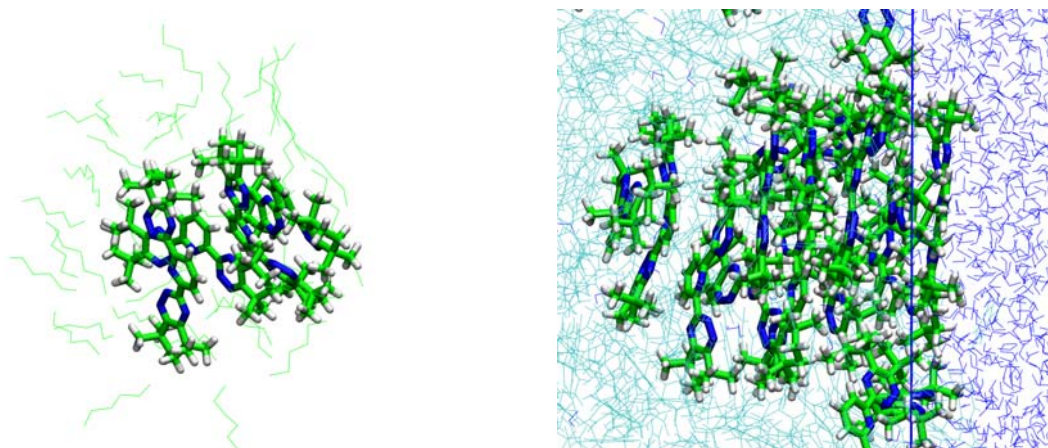

Figure S5 : Zoom on packed neutral CyMe<sub>4</sub>BTPs at the end of dynamics (juxtaposed liquids) in the hexane phase (*left*) and in the nitrobenzene phase (*right*).



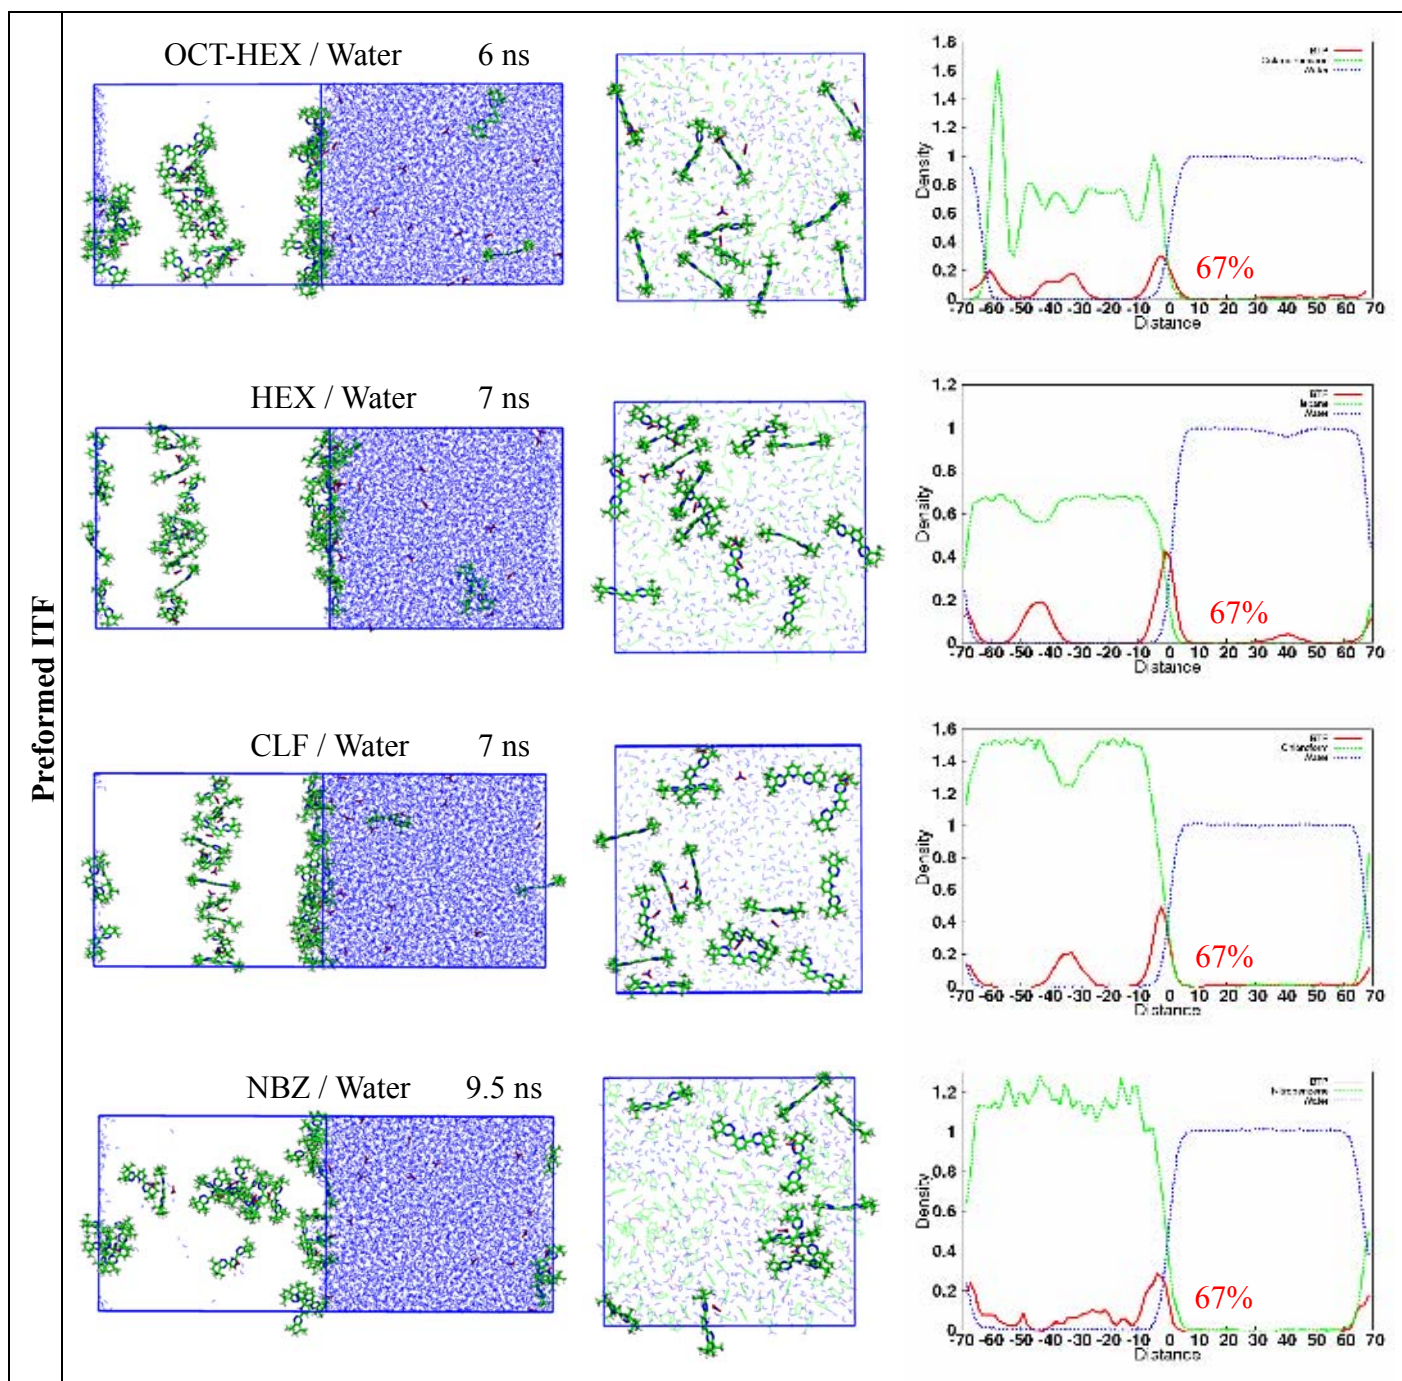

Figure S6 : 30  $\text{cyMe}_4\text{BTPH}^+ \text{NO}_3^-$  at preformed “oil“ / water interfaces. *Left* : Snapshots at the end of the simulations (“oil” phase omitted for clarity). *Middle*: Cross section of the different aqueous interfaces ( $xy$  plane,  $\Delta z = 10 \text{ \AA}$ ) at the end of the dynamics. *Right*: Density curves of  $\text{cyMe}_4\text{BTPH}^+$  (red), “oil” (green) and water (blue) and percentage of  $\text{cyMe}_4\text{BTPH}^+$  within  $5 \text{ \AA}$  from the two interfaces.

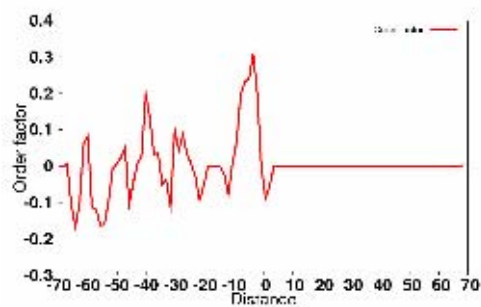

OCT-HEX / Water

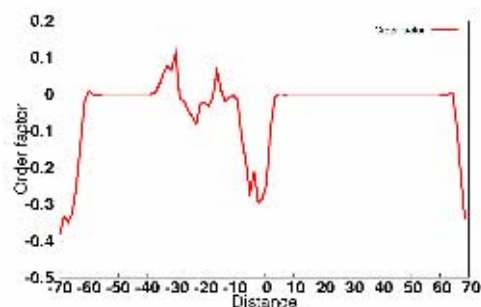

HEX / Water

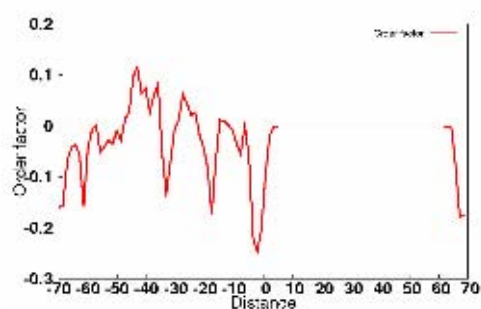

CLF / Water

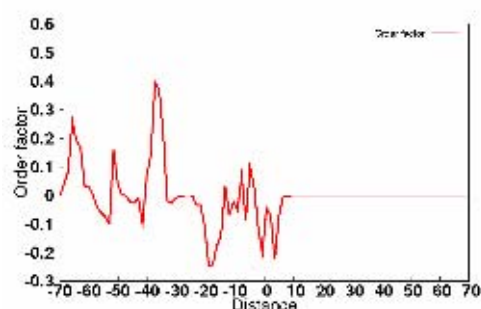

NBZ / Water

Demix

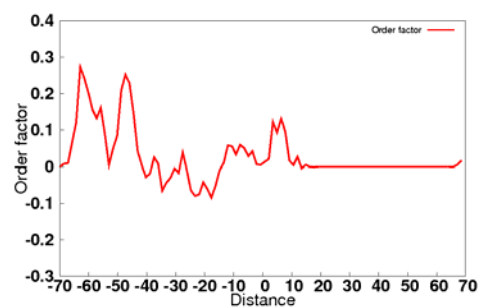

OCT-HEX / Water

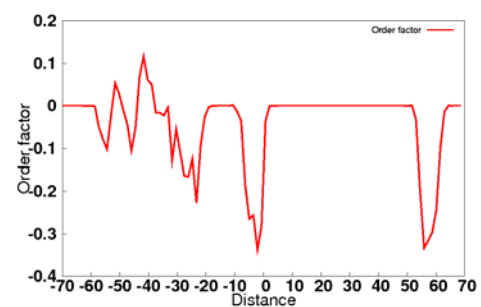

HEX / Water

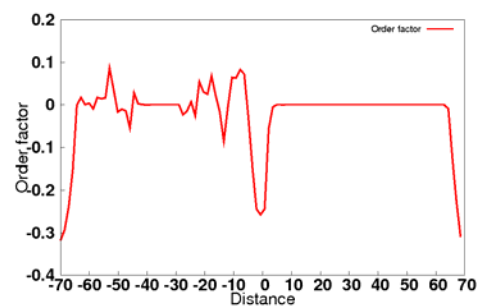

CLF / Water

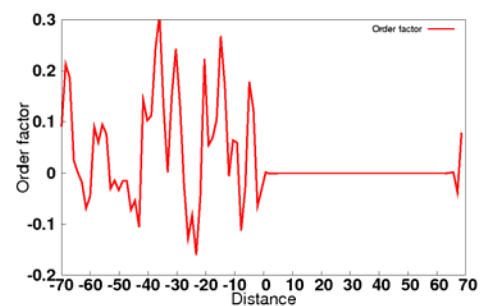

NBZ / Water

Figure S7 : Order factor  $S(\theta)$  of  $\text{CyMe}_4\text{BTP}$  as a function of  $z$  position. Average over the 30 BTPs for the last 0.5 ns.



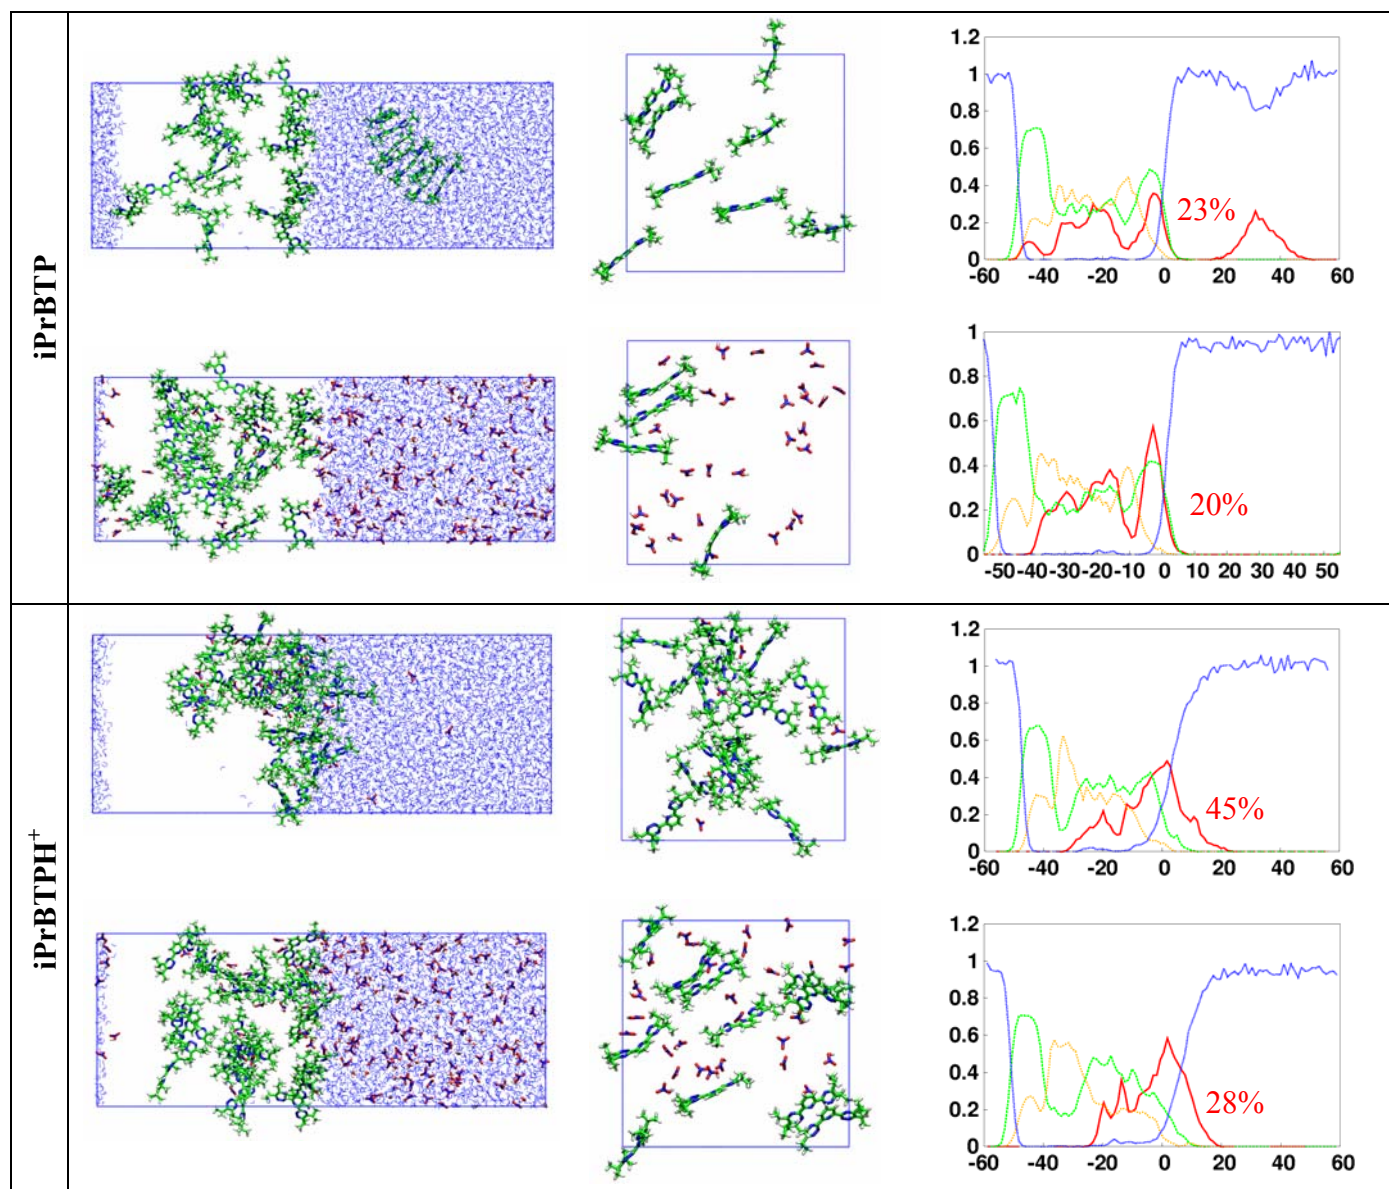

**Figure S8** : 30  $iPrBTP$  and 30  $iPrBTPH^+ NO_3^-$  at the OCT-HEX / water (*top*) and OCT-HEX / nitric acid (*bottom*) preformed interfaces. *Left* : Final snapshots ("oil" hidden for clarity). *Middle*: Cross section of the interface (xy plane,  $\Delta z = 10 \text{ \AA}$ ). *Right*: Density curves of  $iPrBTP(H^+)$  (red), octanol (green), hexane (orange) and water (blue), and percentage of  $iPrBTP(H^+)$  within 5  $\text{\AA}$  from the two interfaces.
